# Supplementary material for: Recombinant HALT-1 induces mitochondrial-associated apoptotic mechanism in HeLa cells
Source: Research Square preprint supplement (doi:10.21203/rs.3.rs-7721623/v1), 2025-10-16
Supplement: Supplementary file 1 [file beebf51e5a4586183ce06539.pdf]

## Appendix. Supplementary materials

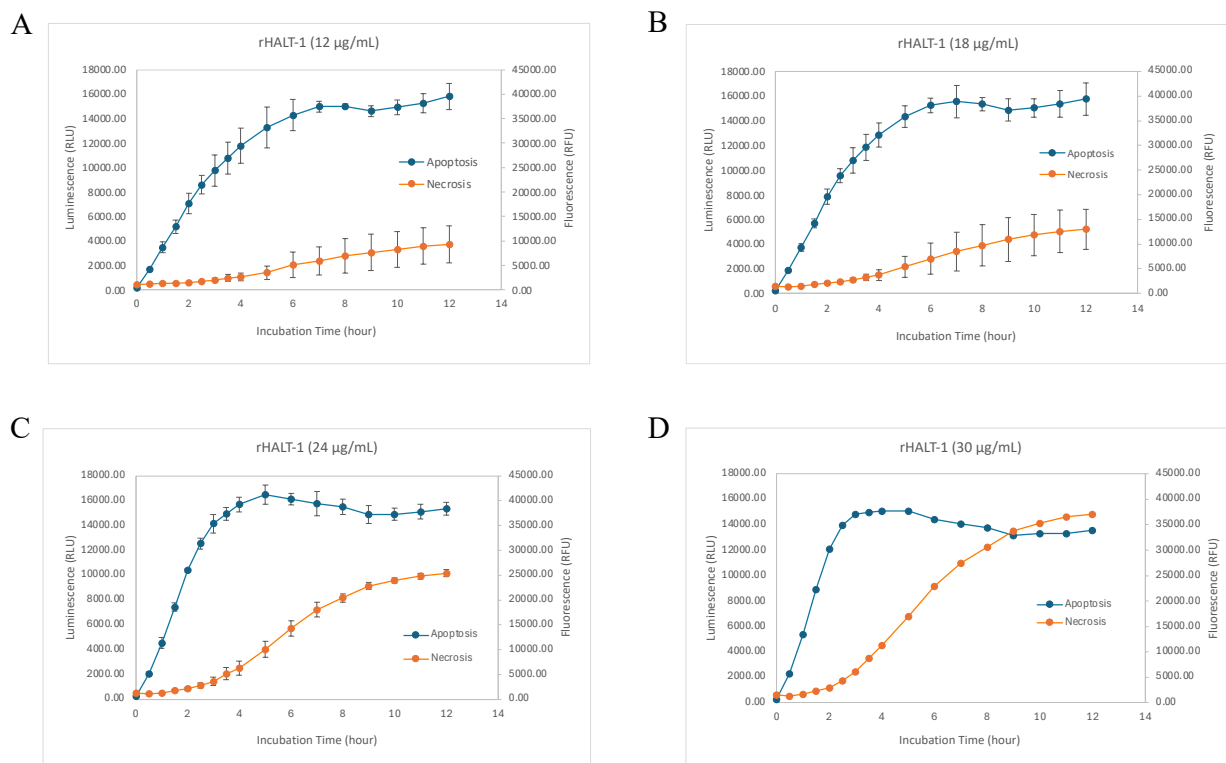

**Figure S1. Mode of apoptosis and necrosis of rHALT-1-treated HeLa cells at four different concentrations.** HeLa cells were cultured in a 96-well plate at a density of  $1 \times 10^4$  cells/well and incubated overnight for 16 hours. The line graphs represent the trends of apoptosis and necrosis observed over 12 hours, with (A) 12 µg/mL, (B) 18 µg/mL, (C) 24 µg/mL, and (D) 30 µg/mL of rHALT-1. The data were collected from three independent experiments with triplicate readings ( $n = 3$ ) and presented as the mean  $\pm$  SD of relative luminescence or fluorescence units (RLU or RFU).

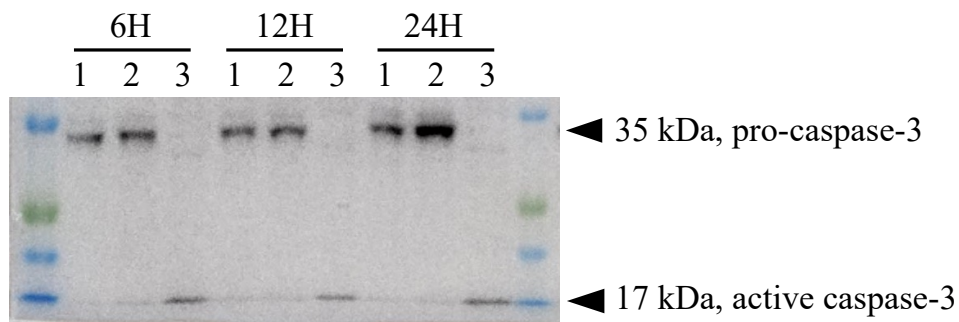

**Figure S2. Detection of pro-caspase-3 and active caspase-3 in treated and untreated HeLa cells by Western blot.** HeLa cells were untreated or treated with 12  $\mu\text{g/mL}$  rHALT-1 or 100 ng/mL hTRAIL, and subsequently cell lysates (10  $\mu\text{g}$ ) were collected at 6, 12, and 24 hours for SDS-PAGE followed by Western blot analysis. Lanes 1, 2, and 3 represent lysates from untreated, rHALT-1-treated, and hTRAIL-treated cells, respectively, showing the presence of pro-caspase-3 and cleaved (active) caspase-3. Arrowheads indicate the detected bands and their corresponding molecular weights in kilodaltons (kDa).

A

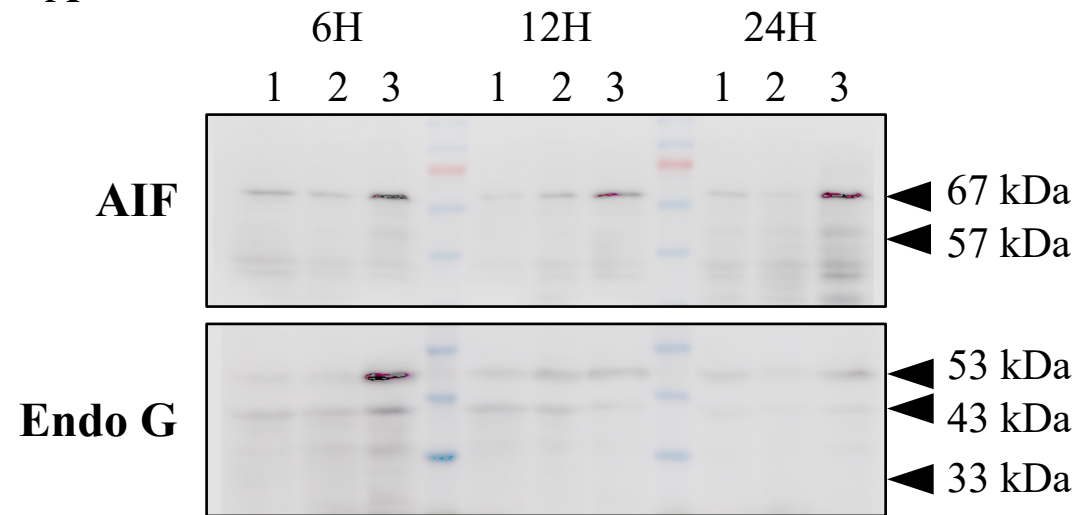

B

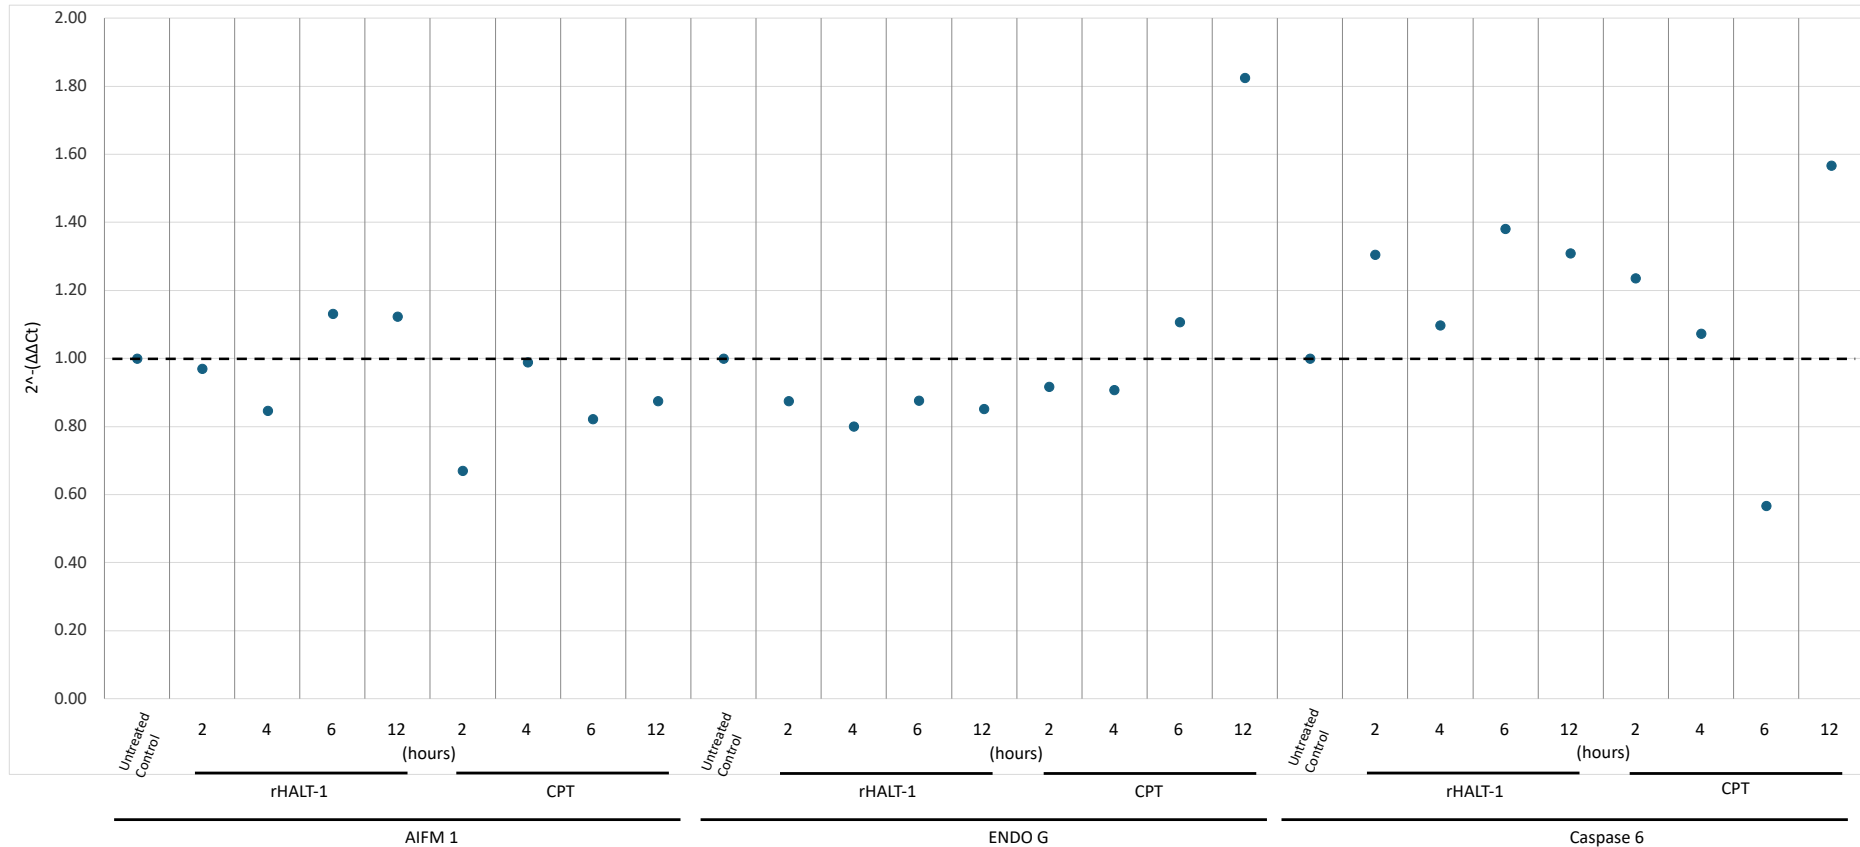

**Figure 3S. Time-dependent apoptotic responses to rHALT-1 in HeLa cells involving AIF, Endo G, and Caspase 6. (A)** HeLa cells were left untreated (1), and treated with 12  $\mu\text{g/mL}$  rHALT-1 (2) and 100  $\text{ng/mL}$  hTRAIL (3) for 6, 12, and 24 h. Whole-cell lysates (10  $\mu\text{g}$ ) were fractionated by 12 % SDS-PAGE and subjected to western blotting analysis. Specific monoclonal antibodies were used to detect the expression of AIF and Endo G. **(B) Relative gene expression changes of *AIFM1*, *Endo G*, and *caspase 6* at time points 2, 4, 6, and 12 hours following rHALT-1 or CPT treatment.** Gene expression levels were measured using qRT-PCR and normalized to the GAPDH gene. The y-axis represents fold changes in

expression,  $2^{(-\Delta\Delta Ct)}$ , relative to untreated controls (dashed line at 1.0). The x-axis represents different genes (*AIFM1*, *ENDOG*, and *caspase 6*), with corresponding time points (2, 4, 6, and 12 hours) post-treatment, along with an untreated control for each gene. Each dot (blue) represents the mean of data duplicate data.
